# Supplementary material
Source: PubMed Central journal article supplement (PMC4255148)
Supplement: NIHMS635939-supplement-01.pdf [file NIHMS635939-supplement-01.pdf]

Supplemental Table 1. Selected Characteristics of the Study Cohort by Absolute Alcohol (AA) Drinking Month 1 – n (%)

| Characteristic                          | N <sup>a</sup> | Levels of alcohol exposure |            |           |           |            |          | p-value          |
|-----------------------------------------|----------------|----------------------------|------------|-----------|-----------|------------|----------|------------------|
|                                         |                | 0                          | <0.10      | 0.10<.25  | 0.25<0.50 | 0.50<1.00  | ≥1.00    |                  |
| oz AA/day <sup>b</sup><br>(drinks/week) |                | 0                          | (<1.5)     | (1.5<3.5) | (3.5<7.0) | (7.0<14.0) | (≥14.00) |                  |
|                                         | 4,496          | 3183 (71.2)                | 733 (16.4) | 245 (5.5) | 155 (3.5) | 96 (2.2)   | 59 (1.3) |                  |
| Passive smoke exposure since pregnant   |                |                            |            |           |           |            |          |                  |
| No                                      | 3155           | 2198 (69.7)                | 584 (18.5) | 177 (5.6) | 111 (3.5) | 64 (2.0)   | 21 (0.7) | <i>P</i> <0.0001 |
| Yes                                     | 1315           | 985 (74.9)                 | 149 (11.3) | 68 (5.2)  | 44 (3.4)  | 32 (2.4)   | 37 (2.8) |                  |
| Use of marijuana month before pregnancy |                |                            |            |           |           |            |          |                  |
| No                                      | 4184           | 3005 (71.8)                | 695 (16.6) | 219 (5.2) | 140 (3.4) | 85 (2.0)   | 40 (1.0) | <i>P</i> <0.0001 |
| Yes                                     | 280            | 174 (62.1)                 | 36 (12.9)  | 26 (9.3)  | 15 (5.4)  | 11 (3.9)   | 18 (6.4) |                  |
| Use of cocaine month before pregnancy   |                |                            |            |           |           |            |          |                  |
| No                                      | 4443           | 3172 (71.4)                | 729 (16.4) | 242 (5.5) | 154 (3.5) | 94 (2.1)   | 52 (1.2) | <i>P</i> <0.0001 |
| Yes                                     | 24             | 10 (41.7)                  | 2 (8.3)    | 3 (12.5)  | 1(4.2)    | 2 (8.3)    | 6 (25.0) |                  |
| Exercise year before pregnancy          |                |                            |            |           |           |            |          |                  |
| No                                      | 1363           | 1064 (78.1)                | 178 (13.1) | 54 (4.0)  | 24 (1.8)  | 22 (1.6)   | 21 (1.5) | <i>P</i> <0.0001 |
| Yes                                     | 3104           | 2117 (68.2)                | 554 (17.9) | 191 (6.2) | 131 (4.2) | 74 (2.4)   | 37 (1.2) |                  |
| Multivitamin use <sup>c</sup>           |                |                            |            |           |           |            |          |                  |
| No                                      | 3228           | 2388 (74.0)                | 491 (15.2) | 153 (4.7) | 92 (2.9)  | 64 (2.0)   | 40 (1.2) | <i>P</i> <0.0001 |
| Yes                                     | 1222           | 776 (63.5)                 | 241 (19.7) | 92 (7.5)  | 63 (5.2)  | 32 (2.6)   | 18 (1.5) |                  |
| Prenatal vitamin use <sup>c</sup>       |                |                            |            |           |           |            |          |                  |
| No                                      | 374            | 292 (78.1)                 | 60 (16.0)  | 8 (2.1)   | 6 (1.6)   | 6 (1.6)    | 2 (0.5)  | <i>P</i> =0.0036 |
| Yes                                     | 4096           | 2891 (70.6)                | 673 (16.4) | 237 (5.8) | 149 (3.6) | 90 (2.2)   | 56 (1.4) |                  |
| Respiratory problem                     |                |                            |            |           |           |            |          |                  |

|                        |                         |      |             |            |           |           |          |          |                  |
|------------------------|-------------------------|------|-------------|------------|-----------|-----------|----------|----------|------------------|
|                        | No                      | 3436 | 2412 (70.2) | 582 (16.9) | 198 (3.7) | 128 (3.7) | 71 (2.1) | 45 (1.3) | <i>P</i> =0.0054 |
|                        | Yes                     | 842  | 635 (75.4)  | 121 (14.4) | 36 (4.3)  | 22 (2.6)  | 19 (2.3) | 9 (1.1)  |                  |
| Fetal anomalies        |                         |      |             |            |           |           |          |          |                  |
|                        | No                      | 3422 | 2415 (70.6) | 574 (16.8) | 191 (5.6) | 129 (3.8) | 73 (2.1) | 40 (1.2) | <i>P</i> <0.1034 |
|                        | Yes                     | 836  | 619 (74.0)  | 121 (14.5) | 44 (5.3)  | 20 (2.4)  | 17 (2.0) | 15 (1.8) |                  |
| Infant Gender          |                         |      |             |            |           |           |          |          |                  |
|                        | Male                    | 2256 | 1586 (70.3) | 386 (17.1) | 135 (6.0) | 69 (3.1)  | 53 (2.4) | 27 (1.2) | <i>P</i> <0.1729 |
|                        | Female                  | 2174 | 1566 (72.0) | 340 (15.6) | 109 (5.0) | 86 (4.0)  | 42 (1.9) | 31 (1.4) |                  |
| Incompetent cervix     |                         |      |             |            |           |           |          |          |                  |
|                        | No                      | 4231 | 3008 (71.1) | 697 (16.5) | 233 (5.5) | 149 (3.5) | 89 (2.1) | 55 (1.3) | <i>P</i> =0.8793 |
|                        | Yes                     | 38   | 30 (79.0)   | 5 (13.2)   | 1 (2.6)   | 1 (2.6)   | 1 (2.6)  | 0 (0.0)  |                  |
| Placental problems     |                         |      |             |            |           |           |          |          |                  |
|                        | No                      | 4103 | 2923 (71.2) | 674 (16.4) | 222 (5.4) | 144 (3.5) | 85 (2.1) | 55 (1.3) | <i>P</i> =0.4453 |
|                        | Yes                     | 166  | 114 (68.7)  | 28 (16.9)  | 13 (7.8)  | 6 (3.6)   | 5 (3.0)  | 0 (0.0)  |                  |
| Father's ethnicity     |                         |      |             |            |           |           |          |          |                  |
|                        | Caucasian               | 2978 | 1939 (65.1) | 591 (19.9) | 204 (6.9) | 132 (4.4) | 73 (2.5) | 39 (1.3) | <i>P</i> <0.0001 |
|                        | Black, African American | 475  | 380 (80.0)  | 48 (10.1)  | 20 (4.2)  | 9 (1.9)   | 8 (1.7)  | 10 (2.1) |                  |
|                        | Hispanic                | 801  | 687 (85.8)  | 65 (8.1)   | 17 (2.1)  | 12 (1.5)  | 13 (1.6) | 9 (0.9)  |                  |
|                        | Asian                   | 63   | 55 (87.3)   | 8 (12.7)   | 0 (0.0)   | 0 (0.0)   | 0 (0.0)  | 0 (0.0)  |                  |
|                        | Other                   | 132  | 107 (81.1)  | 15 (11.4)  | 4 (3.0)   | 2 (1.5)   | 2 (1.5)  | 2 (1.5)  |                  |
| STD                    |                         |      |             |            |           |           |          |          |                  |
|                        | No                      | 3899 | 2753 (70.6) | 654 (16.8) | 215 (5.5) | 140 (3.6) | 85 (2.2) | 52 (1.3) | <i>P</i> =0.1188 |
|                        | Yes                     | 382  | 295 (77.2)  | 48 (12.6)  | 21 (5.5)  | 10 (2.6)  | 5 (1.3)  | 3 (0.8)  |                  |
| Induction/Augmentation |                         |      |             |            |           |           |          |          |                  |
|                        | No                      | 2041 | 1460 (71.5) | 333 (16.3) | 108 (5.3) | 78 (3.8)  | 41 (2.0) | 21 (1.0) | <i>P</i> =0.5520 |

|                 |     |      |             |            |           |           |          |          |                  |
|-----------------|-----|------|-------------|------------|-----------|-----------|----------|----------|------------------|
|                 | Yes | 2211 | 1563 (70.7) | 364 (16.5) | 129 (5.8) | 72 (3.3)  | 49 (2.2) | 34 (1.5) |                  |
| Maternal asthma | No  | 3444 | 2412 (70.0) | 593 (17.2) | 200 (5.8) | 126 (3.7) | 74 (2.2) | 39 (1.1) | <i>P</i> =0.0035 |
|                 | Yes | 839  | 637 (75.9)  | 110 (13.1) | 36 (4.3)  | 24 (2.9)  | 16 (1.9) | 16 (1.9) |                  |

---

<sup>a</sup>Numbers may not sum to total N due to missing values

<sup>b</sup>AA= absolute alcohol ounces; 0.5 oz AA is approximately equal to 1 standard drink

<sup>c</sup>Multivitamin and prenatal vitamin use from month prior to conception until baseline interview



Supplemental Table 2. Maternal Characteristics and Low Birth Weight, Preterm Delivery, and IUGR

|                                         | N <sup>a</sup> | LBW (%)   | p value  | N    | PTD (%)   | p value  | N    | IUGR (%) <sup>b</sup> | p-value  |
|-----------------------------------------|----------------|-----------|----------|------|-----------|----------|------|-----------------------|----------|
| Passive smoke exposure since pregnant   |                |           |          |      |           |          |      |                       |          |
| No                                      | 3171           | 125 (3.9) | P=0.0004 | 3175 | 201 (6.3) | P=0.0199 | 3161 | 241 (7.6)             | P=0.2222 |
| Yes                                     | 1316           | 85 (6.4)  |          | 1319 | 109 (8.3) |          | 1309 | 114 (8.7)             |          |
| Use of marijuana month before pregnancy |                |           |          |      |           |          |      |                       |          |
| No                                      | 4201           | 185 (4.4) | P=0.0014 | 4207 | 279 (6.6) | P=0.0046 | 4186 | 320 (7.6)             | P=0.0032 |
| Yes                                     | 280            | 24 (8.6)  |          | 280  | 31 (11.1) |          | 278  | 35 (12.6)             |          |
| Use of cocaine month before pregnancy   |                |           |          |      |           |          |      |                       |          |
| No                                      | 4460           | 206 (4.6) | P=0.0678 | 4466 | 307 (6.9) | P=0.2783 | 4443 | 353 (8.0)             | P=0.9441 |
| Yes                                     | 24             | 3 (12.5)  |          | 24   | 3 (12.5)  |          | 24   | 2 (8.3)               |          |
| Exercise yr before pregnancy            |                |           |          |      |           |          |      |                       |          |
| No                                      | 1357           | 91 (6.7)  | P<0.0001 | 1364 | 106 (7.8) | P=0.1294 | 1354 | 115 (8.5)             | P=0.3734 |
| Yes                                     | 3127           | 118 (3.8) |          | 3127 | 204 (6.5) |          | 3113 | 240 (7.7)             |          |
| Multivitamin use <sup>c</sup>           |                |           |          |      |           |          |      |                       |          |
| No                                      | 3235           | 155 (4.8) | P=0.4911 | 3242 | 237 (7.3) | P=0.0852 | 3220 | 262 (8.1)             | P=0.4732 |
| Yes                                     | 1231           | 53 (4.3)  |          | 1231 | 72 (5.9)  |          | 1137 | 92 (7.5)              |          |
| Prenatal vitamin use <sup>c</sup>       |                |           |          |      |           |          |      |                       |          |
| No                                      | 374            | 21 (5.6)  | P=0.3590 | 375  | 30 (8.0)  | P=0.3791 | 372  | 27 (7.3)              | P=0.6105 |
| Yes                                     | 4113           | 188 (4.6) |          | 4119 | 280 (6.8) |          | 4098 | 328 (8.0)             |          |
| Respiratory problems                    |                |           |          |      |           |          |      |                       |          |
| No                                      | 3455           | 154 (4.5) | P=0.2334 | 3455 | 226 (6.5) | P=0.4263 | 3440 | 271 (7.9)             | P=0.8845 |
| Yes                                     | 849            | 46 (5.4)  |          | 849  | 62 (7.3)  |          | 847  | 68 (8.0)              |          |

|                          |                         |      |           |          |      |           |          |      |           |          |
|--------------------------|-------------------------|------|-----------|----------|------|-----------|----------|------|-----------|----------|
| Fetal anomalies          |                         |      |           |          |      |           |          |      |           |          |
|                          | No                      | 3442 | 144 (4.2) | P=0.0024 | 3442 | 218 (6.3) | P=0.0694 | 3433 | 277 (8.1) | P=0.4638 |
|                          | Yes                     | 842  | 56 (6.7)  |          | 842  | 68 (8.1)  |          | 835  | 61 (7.3)  |          |
| Infant Gender            |                         |      |           |          |      |           |          |      |           |          |
|                          | Male                    | 2268 | 92 (4.1)  | P=0.0489 | 2268 | 170 (7.5) | P=0.0912 | 2258 | 166 (7.4) | P=0.1189 |
|                          | Female                  | 2188 | 116 (5.3) |          | 2188 | 136 (6.2) |          | 2181 | 188 (8.6) |          |
| Incompetent cervix       |                         |      |           |          |      |           |          |      |           |          |
|                          | No                      | 4244 | 191 (4.5) | P<0.0001 | 4257 | 275 (6.5) | P<0.0001 | 4244 | 335 (7.9) | P=0.6646 |
|                          | Yes                     | 38   | 9 (23.7)  |          | 38   | 12 (31.6) |          | 34   | 2 (5.9)   |          |
| Placental problems       |                         |      |           |          |      |           |          |      |           |          |
|                          | No                      | 4128 | 179 (4.3) | P<0.0001 | 4128 | 259 (6.3) | P<0.0001 | 4113 | 324 (7.9) | P=0.9816 |
|                          | Yes                     | 166  | 21 (12.7) |          | 166  | 28 (16.9) |          | 164  | 13 (7.9)  |          |
| Father's ethnicity       |                         |      |           |          |      |           |          |      |           |          |
|                          | Caucasian               | 2997 | 90 (3.0)  | P<0.0001 | 3000 | 171 (5.7) | P<0.0001 | 2988 | 217 (7.3) | P=0.0151 |
|                          | Black, African-American | 476  | 39 (8.2)  |          | 476  | 38 (8.0)  |          | 472  | 44 (9.3)  |          |
|                          | Hispanic                | 799  | 63 (7.9)  |          | 802  | 78 (9.7)  |          | 798  | 70 (8.8)  |          |
|                          | Asian                   | 63   | 2 (3.2)   |          | 63   | 1 (1.6)   |          | 63   | 11 (17.5) |          |
|                          | Other                   | 131  | 13 (9.9)  |          | 132  | 19 (14.4) |          | 131  | 13 (9.9)  |          |
| STD                      |                         |      |           |          |      |           |          |      |           |          |
|                          | No                      | 3922 | 176 (4.5) | P=0.0448 | 3922 | 251 (6.4) | P=0.0053 | 3906 | 309 (7.9) | P=0.8033 |
|                          | Yes                     | 385  | 26 (6.8)  |          | 385  | 39 (10.1) |          | 384  | 29 (7.6)  |          |
| Induction / augmentation |                         |      |           |          |      |           |          |      |           |          |
|                          | No                      | 2053 | 113 (5.5) | P=0.0207 | 2053 | 170 (8.3) | P<0.0001 | 2044 | 157 (7.7) | P=0.4874 |
|                          | Yes                     | 2224 | 89 (4.0)  |          | 2224 | 116 (5.2) |          | 2216 | 183 (8.3) |          |
| Maternal asthma          |                         |      |           |          |      |           |          |      |           |          |

|     |      |           |          |      |           |          |      |           |          |
|-----|------|-----------|----------|------|-----------|----------|------|-----------|----------|
| No  | 3467 | 151 (4.4) | P=0.0361 | 3467 | 213 (6.1) | P=0.0018 | 3453 | 265 (7.7) | P=0.3222 |
| Yes | 842  | 51 (6.1)  |          | 842  | 77 (9.1)  |          | 839  | 73 (8.7)  |          |

---

<sup>a</sup>Numbers may not sum to total N due to missing values

<sup>b</sup>IUGR based on 1999 US singletons adjusted for gender and ethnicity

<sup>c</sup>Multivitamin and prenatal vitamin use from month prior to conception until baseline interview

Supplemental Table 3: Unadjusted and adjusted estimates for birth length and head circumference evaluated as a continuous outcome

|                                          | Birth Length <sup>a</sup> |         |          |         | Head Circumference <sup>b</sup> |         |          |         |
|------------------------------------------|---------------------------|---------|----------|---------|---------------------------------|---------|----------|---------|
|                                          | Unadjusted                |         | Adjusted |         | Unadjusted                      |         | Adjusted |         |
|                                          | $\beta$                   | p-value | $\beta$  | p-value | $\beta$                         | p-value | $\beta$  | p-value |
| <u>Month 1 drinking</u>                  |                           |         |          |         |                                 |         |          |         |
| None                                     | Ref                       |         | Ref      |         | Ref                             |         | Ref      |         |
| < 0.10 oz AA/day                         | 0.0012                    | 0.302   | -0.0008  | 0.49    | 0.0010                          | 0.127   | -0.0002  | 0.83    |
| 0.10<0.25 oz AA/day                      | 0.0052                    | 0.006   | 0.0034   | 0.07    | 0.0016                          | 0.012   | 0.0034   | 0.03    |
| $\geq$ 0.25 oz AA/day                    | 0.0009                    | 0.602   | -0.0002  | 0.89    | 0.0014                          | 0.321   | 0.0007   | 0.61    |
| <u>First Trimester drinking</u>          |                           |         |          |         |                                 |         |          |         |
| Abstinent                                | Ref                       |         | Ref      |         | Ref                             |         | Ref      |         |
| 1st month only                           | 0.0018                    | 0.102   | -0.0002  | 0.89    | 0.0009                          | 0.026   | 0.0008   | 0.36    |
| Drinking first three mos                 | 0.0035                    | 0.008   | 0.0031   | 0.02    | 0.0011                          | 0.018   | 0.0019   | 0.08    |
| <u>Drinking up to baseline interview</u> |                           |         |          |         |                                 |         |          |         |
| Abstinent                                | Ref                       |         | Ref      |         | Ref                             |         | Ref      |         |
| Drinking                                 | 0.0025                    | 0.005   | 0.0011   | 0.21    | 0.0023                          | 0.003   | 0.0012   | 0.11    |

<sup>a</sup> analyzed as birth length in inches transformed using log-base 10

<sup>b</sup> analyzed as head circumference in centimeters transformed using log-base 10

Multivariable analysis included parity, maternal age, education, ethnicity, smoking, BMI, marital status, caffeine use 1st trimester, exercise, bleeding, hypertension, preterm labor, incompetent cervix, fetal anomalies, maternal asthma, placental problems, maternal diabetes
